# Supplementary material for: Validity of observational evidence on putative risk and protective factors: appraisal of 3744 meta-analyses on 57 topics
Source: PubMed Central journal article supplement (PMC8259334; doi:10.1186/s12916-021-02020-6), 2021-07-06

**Additional file 3: Figures 6 to 7 Missing data**

6) Level of evidence of associations without missing data – all associations

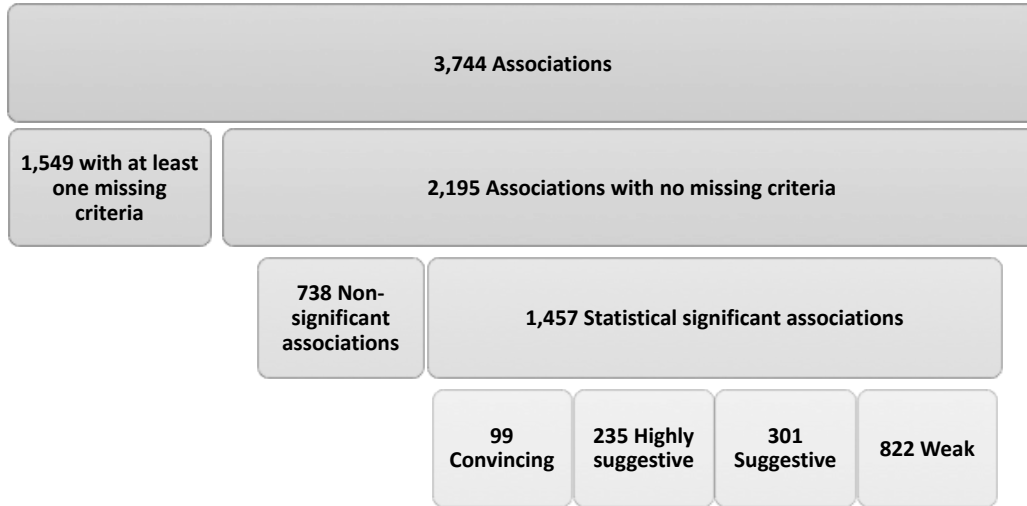

7) Distribution of associations fulfilling the different criteria – statistically significant associations

Percentages of meta-analyses fulfilling the different Criteria

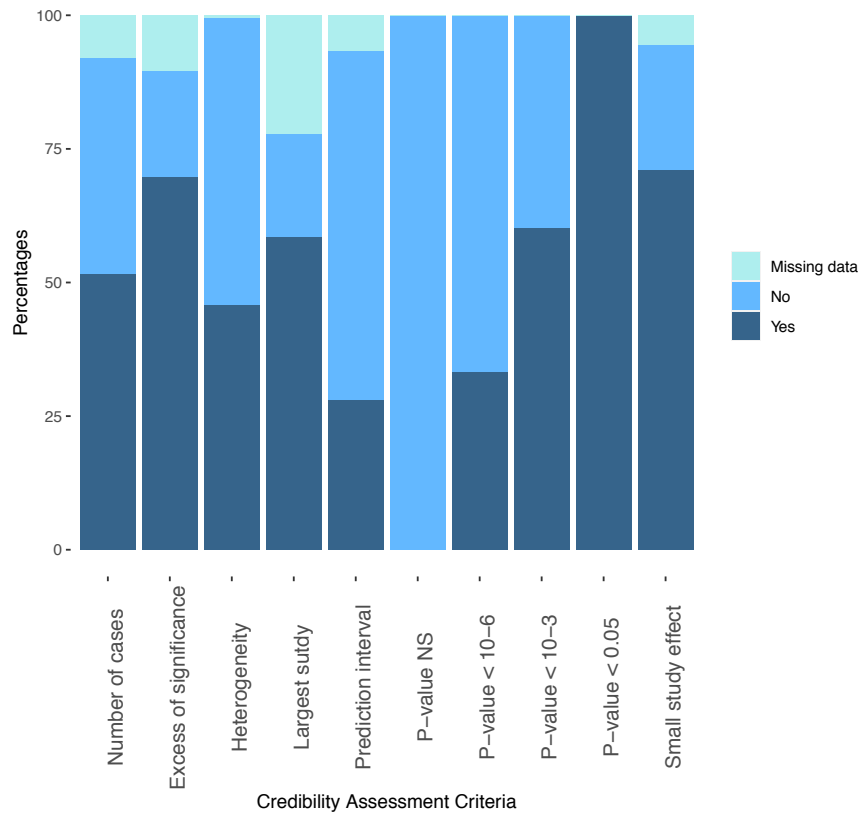

Supplement: 12916_2021_2020_MOESM3_ESM.pdf [file 12916_2021_2020_MOESM3_ESM.pdf]
