# Supplementary material for: Validity of observational evidence on putative risk and protective factors: appraisal of 3744 meta-analyses on 57 topics
Source: PubMed Central journal article supplement (PMC8259334; doi:10.1186/s12916-021-02020-6), 2021-07-06
Supplement: 12916_2021_2020_MOESM5_ESM.pdf [file 12916_2021_2020_MOESM5_ESM.pdf]

**Additional file 5: Table 1 Kappa matrix across credibility criteria (below) and meta-analyzed across umbrella reviews (above)**

|                               | <b>P &lt; 10-6</b>                | <b>P &lt; 10-3</b>                    | <b>Number of cases</b>                | <b>Largest study</b>                  | <b>Prediction interval</b>            | <b>I<sup>2</sup> &gt; 50%</b>           | <b>Small study effect</b>               | <b>Excess of significance</b>           |
|-------------------------------|-----------------------------------|---------------------------------------|---------------------------------------|---------------------------------------|---------------------------------------|-----------------------------------------|-----------------------------------------|-----------------------------------------|
| <b>P &lt; 10-6</b>            |                                   | 0.43<br>[ 0.39; 0.48]<br>N=51; I2=50% | 0.07<br>[ 0.04; 0.10]<br>N=46; I2=40% | 0.16<br>[ 0.12; 0.19]<br>N=40; I2=47% | 0.44<br>[ 0.35; 0.53]<br>N=52; I2=88% | 0.03<br>[-0.02; 0.07]<br>N=52; I2=38%   | -0.04<br>[-0.07; 0.00]<br>N=51; I2=30%  | 0.02<br>[ 0.00; 0.04]<br>N=49; I2=22%   |
| <b>P &lt; 10-3</b>            | 0.5<br>[0.47; 0.55]<br>N=2289     |                                       | 0.10<br>[ 0.05; 0.14]<br>N=47; I2=51% | 0.30<br>[ 0.25; 0.35]<br>N=39; I2=27% | 0.25<br>[ 0.21; 0.29]<br>N=53; I2=39% | 0.03<br>[-0.02; 0.08]<br>N=53; I2=43%   | 0.06<br>[-0.10; -0.02]<br>N=52; I2=18%  | -0.02<br>[-0.06; 0.02]<br>N=51; I2=44%  |
| <b>Number of cases</b>        | 0.08<br>[0.04; 0.12]<br>N=2107    | 0.15<br>[0.11; 0.2]<br>N=2107         |                                       | 0.00<br>[-0.06; 0.05]<br>N=36; I2=61% | 0.04<br>[ 0.01; 0.06]<br>N=47; I2=39% | -0.13<br>[-0.18; -0.09]<br>N=49; I2=56% | -0.11<br>[-0.15; -0.06]<br>N=45; I2=70% | -0.06<br>[-0.09; -0.03]<br>N=49; I2=42% |
| <b>Largest studies</b>        | 0.18<br>[0.16; 0.21]<br>N=1781    | 0.33<br>[0.28; 0.37]<br>N=1781        | 0.03<br>[-0.01; 0.08]<br>N=1678       |                                       | 0.10<br>[ 0.07; 0.14]<br>N=41; I2=38% | -0.05<br>[-0.10; 0.00]<br>N=42; I2=52%  | 0.10<br>[ 0.04; 0.16]<br>N=42; I2=48%   | 0.12<br>[ 0.05; 0.19]<br>N=37; I2=72%   |
| <b>Prediction interval</b>    | 0.47<br>[0.43; 0.51]<br>N=2136    | 0.25<br>[0.28; 0.31]<br>N=2136        | 0.06<br>[0.03; 0.1]<br>N=1978         | 0.12<br>[0.09; 0.15]<br>N=1642        |                                       | 0.30<br>[ 0.24; 0.36]<br>N=54; I2=63%   | 0.06<br>[ 0.03; 0.08]<br>N=53; I2=28%   | 0.04<br>[ 0.02; 0.07]<br>N=49; I2=37%   |
| <b>I<sup>2</sup> &gt; 50%</b> | 0.01<br>[-0.03; 0.05]<br>N=2277   | 0.04<br>[-0.00; 0.08]<br>N=2277       | -0.09<br>[-0.13; -0.04]<br>N=2099     | -0.06<br>[-0.1; -0.02]<br>N=1772      | 0.33<br>[0.29; 0.37]<br>N=2136        |                                         | 0.13<br>[ 0.09; 0.18]<br>N=52; I2=50%   | 0.09<br>[ 0.05; 0.13]<br>N=50; I2=64%   |
| <b>Small study effect</b>     | -0.05<br>[-0.08; -0.02]<br>N=2164 | -0.05<br>[-0.09; -0.01]<br>N=2164     | -0.05<br>[-0.09; -0.01]<br>N=2000     | 0.15<br>[0.1; 0.2]<br>N=1679          | 0.04<br>[0.02; 0.07]<br>N=2120        | 0.12<br>[0.09; 0.16]<br>N=2163          |                                         | 0.14<br>[ 0.07; 0.22]<br>N=46; I2=76%   |
| <b>Excess of significance</b> | 0.04<br>[0.01; 0.07]<br>N=2052    | 0.02<br>[-0.02; 0.06]<br>N=2052       | -0.03<br>[-0.07; 0.01]<br>N=1941      | 0.19<br>[0.13; 0.24]<br>N=1608        | 0.06<br>[0.03; 0.09]<br>N=1943        | 0.09<br>[0.06; 0.13]<br>N=2043          | 0.21<br>[0.16; 0.26]<br>N=1963          |                                         |
