# Supplementary material for: Validity of observational evidence on putative risk and protective factors: appraisal of 3744 meta-analyses on 57 topics
Source: PubMed Central journal article supplement (PMC8259334; doi:10.1186/s12916-021-02020-6), 2021-07-06
Supplement: 12916_2021_2020_MOESM8_ESM.pdf [file 12916_2021_2020_MOESM8_ESM.pdf]

**Additional file 8: Table 3 Comparisons of observational studies and MR studies**

| Umbrella review                     | Outcome                              | Exposure           | Comparison                          | OBS ES [95% CI]   | MR ES [95% CI]    | OBS Pvalue | MR Pvalue | P-value Het. | ROR [95% CI]      | Direction  | Concordance      | OBS credibility assessment | Genetic                                                                                |
|-------------------------------------|--------------------------------------|--------------------|-------------------------------------|-------------------|-------------------|------------|-----------|--------------|-------------------|------------|------------------|----------------------------|----------------------------------------------------------------------------------------|
| <b>Li 2018</b>                      | Atrial fibrillation                  | SUA                | Hyper vs normal                     | 1.49 [1.24; 1.79] | 1.03 [0.93; 1.15] | 0.000      | 0.585     | 0.001        | 1.45 [1.08; 1.93] | risk       | SIGN obs only    | Suggestive                 | Genetic risk score of 8 SUA related SNPs                                               |
| Serum uric acid and health outcomes | Coronary heart diseases              | SUA                | Hyper vs normal                     | 1.13 [1.05; 1.21] | 1.05 [0.92; 1.18] | 0.001      | 0.442     | 0.315        | 1.08 [0.89; 1.31] | risk       | SIGN obs only    | Suggestive                 | Genetic risk score of 31 SUA related SNPs                                              |
|                                     | Heart failure                        | SUA                | Hyper vs normal                     | 1.65 [1.41; 1.94] | 1.07 [0.88; 1.30] | 0.000      | 0.497     | 0.001        | 1.54 [1.08; 2.20] | risk       | SIGN obs only    | Highly suggestive          | Genetic risk score of 14 SUA related SNPs                                              |
|                                     | Hypertension                         | SUA                | Hyper versus normal                 | 1.48 [1.33; 1.65] | 0.98 [0.90; 1.06] | 0.000      | 0.628     | 0.000        | 1.51 [1.25; 1.83] | opposite   | SIGN obs only    | Highly suggestive          | Genetic risk score of 8 SUA related SNPs                                               |
|                                     | Cancer                               | SUA                | Highest versus lowest               | 1.04 [0.99; 1.08] | 0.95 [0.83; 1.08] | 0.077      | 0.445     | 0.201        | 1.09 [0.92; 1.30] | opposite   | NONSIGN mr & obs | Non-significant            | Genetic risk score of 8 SUA related SNPs                                               |
|                                     | Chronic kidney diseases              | SUA                | 1 mg/dl SUA increase                | 1.22 [1.16; 1.28] | 1.20 [0.96; 1.50] | 0.000      | 0.109     | 0.887        | 1.02 [0.77; 1.33] | risk       | SIGN obs only    | Highly suggestive          | Genetic risk score of 8 SUA related SNPs                                               |
|                                     | Type 2 diabetes mellitus             | SUA                | 1 mg/dl SUA increase                | 1.17 [1.09; 1.25] | 0.95 [0.86; 1.05] | 0.000      | 0.314     | 0.001        | 1.23 [1.04; 1.46] | opposite   | SIGN obs only    | Suggestive                 | Genetic risk score of 14 SUA related SNPs                                              |
|                                     | Diabetic macrovascular complications | SUA                | Continuous or categorical SUA level | 1.03 [1.00; 1.06] | 1.18 [1.06; 1.33] | 0.047      | 0.004     | 0.023        | 0.87 [0.76; 1.01] | risk       | SIGN mr & obs    | Weak                       | Genetic risk score of 3 SUA related SNPs                                               |
|                                     | Parkinson's disease                  | SUA                | Hyper vs normal                     | 0.65 [0.43; 0.97] | 1.55 [1.10; 2.18] | 0.038      | 0.012     | 0.001        | 0.42 [0.20; 0.89] | opposite   | SIGN mr & obs    | Weak                       | Genetic risk score of 8 SUA related SNPs                                               |
|                                     | Stroke/ ischemic stroke              | SUA                | Highest versus lowest               | 1.22 [1.02; 1.46] | 0.99 [0.88; 1.12] | 0.030      | 0.870     | 0.058        | 1.23 [0.91; 1.66] | opposite   | SIGN obs only    | Weak                       | Genetic risk score of 14 SUA related SNPs                                              |
| <b>Kohler 2018</b>                  | Depression                           | Coffee consumption |                                     | 0.71 [0.52; 0.99] | 0.89 [0.66; 1.21] | 0.037      | 0.451     | 0.317        | 0.80 [0.43; 1.49] | protective | SIGN obs only    | Weak                       | Genome-wide significant SNPs#                                                          |
| Risk factors for depression         | Depression                           | Coffee consumption |                                     | 0.71 [0.52; 0.99] | 0.95 [0.47; 1.91] | 0.037      | 0.886     | 0.459        | 0.75 [0.27; 2.08] | protective | SIGN obs only    |                            | 3 SNPs functionally relevant to coffee metabolism (rs4410790, rs2472297 and rs2470893) |

| Umbrella review                                                             | Outcome                          | Exposure            | Comparison                                     | OBS ES [95% CI]   | MR ES [95% CI]    | OBS Pvalue | MR Pvalue | P-value Het. | ROR [95% CI]       | Direction  | Concordance   | OBS credibility assessment | Genetic                                             |
|-----------------------------------------------------------------------------|----------------------------------|---------------------|------------------------------------------------|-------------------|-------------------|------------|-----------|--------------|--------------------|------------|---------------|----------------------------|-----------------------------------------------------|
|                                                                             | Depression                       | Obesity             |                                                | 1.35 [1.21; 1.50] | 0.84 [0.74; 1.14] | 0.000      | 0.101     | 0.000        | 1.62 [1.17; 2.23]  | risk       | SIGN obs only | Suggestive                 | FTO rs3751812                                       |
|                                                                             | Depression                       | Obesity             |                                                | 1.35 [1.21; 1.50] | 0.98 [0.90; 1.07] | 0.000      | 0.663     | 0.000        | 1.38 [1.13; 1.68]  | risk       | SIGN obs only |                            | wGRS from 32 SNPs associated to BMI in GWAS studies |
|                                                                             | Depression                       | Smoking             |                                                | 1.68 [1.55; 1.82] | 1.01 [0.96; 1.06] | 0.000      | 0.694     | 0.000        | 1.66 [1.46; 1.89]  | opposite*  | SIGN obs only | Weak                       | CHRNA5 rs16969968 and CHRNA3rs1051730               |
|                                                                             | Depression                       | Smoking             |                                                | 1.68 [1.55; 1.82] | 1.02 [0.96; 1.08] | 0.000      | 0.510     | 0.000        | 1.65 [1.43; 1.89]  | risk       | SIGN obs only |                            | CHRNA5 rs16969968 and CHRNA3rs1051730               |
|                                                                             | Depression                       | Smoking             |                                                | 1.68 [1.55; 1.82] | 1.01 [0.95; 1.07] | 0.000      | 0.743     | 0.000        | 1.66 [1.45; 1.91]  | risk       | SIGN obs only |                            | CHRNA5 rs16969968 and CHRNA3rs1051730               |
|                                                                             | Depression                       | Smoking             |                                                | 1.68 [1.55; 1.82] | 1.02 [0.88; 1.18] | 0.000      | 0.791     | 0.000        | 1.65 [1.31; 2.07]  | risk       | SIGN obs only |                            | CHRNA3 gene cluster rs1051730                       |
|                                                                             | Depression                       | Smoking             |                                                | 1.68 [1.55; 1.82] | 0.85 [0.66; 1.10] | 0.000      | 0.212     | 0.000        | 1.98 [1.41; 2.76]  | opposite   | SIGN obs only |                            | CHRNA3 gene cluster rs1051730                       |
| <b>Belbasis 2020</b>                                                        | Schizophrenia spectrum disorders | Cannabis use        | Ever vs never; users vs non-users              | 3.90 [2.84; 5.35] | 1.01 [0.93; 1.10] | 0.000      | 0.816     | 0.000        | 3.86 [2.59; 5.76]  | risk       | SIGN obs only | Highly suggestive          | GRS                                                 |
| Risk factors and peripheral biomarkers for schizophrenia spectrum disorders | Schizophrenia spectrum disorders | Cannabis use        | Ever vs never; users vs non-users              | 3.90 [2.84; 5.35] | 1.41 [1.09; 1.83] | 0.000      | 0.009     | 0.000        | 2.77 [1.56; 4.92]  | risk       | SIGN mr & obs |                            | GRS                                                 |
|                                                                             | Schizophrenia spectrum disorders | Serum vitamin D     | High level vs low levels; Per 10% increase     | 0.12 [0.04; 0.36] | 0.99 [0.97; 1.02] | 0.000      | 0.433     | 0.000        | 0.12 [0.04; 0.37]  | protective | SIGN obs only | Weak                       | GRS                                                 |
|                                                                             | Schizophrenia spectrum disorders | Serum CRP           | High vs low levels; Highest vs lowest quartile | 2.96 [1.74; 5.01] | 1.40 [0.46; 4.25] | 0.000      | 0.553     | 0.233        | 2.11 [0.41; 10.90] | protective | SIGN obs only | Suggestive                 | GRS                                                 |
| <b>Bellou 2018</b>                                                          | T2D                              | Alcohol consumption | Moderate vs never; Per                         | 0.74 [0.67; 0.82] | 1.02 [0.95; 1.09] | 0.000      | 0.572     | 0.000        | 0.73 [0.61; 0.86]  | opposite   | SIGN obs only | Highly suggestive          | Single variant (rs1229984)                          |

| Umbrella review                           | Outcome                  | Exposure                | Comparison                                              | OBS ES [95% CI]   | MR ES [95% CI]      | OBS Pvalue | MR Pvalue | P-value Het. | ROR [95% CI]      | Direction  | Concordance   | OBS credibility assessment | Genetic                    |
|-------------------------------------------|--------------------------|-------------------------|---------------------------------------------------------|-------------------|---------------------|------------|-----------|--------------|-------------------|------------|---------------|----------------------------|----------------------------|
|                                           |                          |                         | units/week increase                                     |                   |                     |            |           |              |                   |            |               |                            |                            |
| Risk factors for type 2 diabetes mellitus | Type 2 diabetes mellitus | Birth weight            | Per 1 kg increase;<br>Per 1 SD increase                 | 0.80 [0.72; 0.88] | 2.94 [1.70; 5.16]   | 0.000      | 0.000     | 0.000        | 0.27 [0.14; 0.52] | opposite   | SIGN mr & obs | Suggestive                 | PRS 5 SNP                  |
|                                           | Type 2 diabetes mellitus | BMI                     | Per 1 SD increase;<br>Per 10 kg/m <sup>2</sup> increase | 1.59 [1.40; 1.80] | 19.40 [6.40; 59.10] | 0.000      | 0.000     | 0.000        | 0.08 [0.02; 0.28] | risk       | SIGN mr & obs | Highly suggestive          | PRS 3 SNP                  |
|                                           | Type 2 diabetes mellitus | BMI                     | Per 1 kg/m <sup>2</sup> increase                        | 1.59 [1.40; 1.80] | 1.39 [1.14; 1.68]   | 0.000      | 0.001     | 0.254        | 1.14 [0.83; 1.57] | risk       | SIGN mr & obs |                            | PRS 96 SNP                 |
|                                           | Type 2 diabetes mellitus | BMI                     | Per 1 kg/m <sup>2</sup> increase                        | 1.59 [1.40; 1.80] | 1.35 [1.12; 1.62]   | 0.000      | 0.001     | 0.151        | 1.18 [0.86; 1.61] | risk       | SIGN mr & obs |                            | Single variant (rs9939609) |
|                                           | Type 2 diabetes mellitus | BMI                     | Per 1 kg/m <sup>2</sup> increase                        | 1.59 [1.40; 1.80] | 1.27 [1.18; 1.36]   | 0.000      | 0.000     | 0.002        | 1.25 [1.03; 1.52] | risk       | SIGN mr & obs |                            | PRS 14 SNP                 |
|                                           | T2D                      | Coffee consumption      | Highest versus lowest; Per 1cup/day                     | 0.70 [0.65; 0.75] | 1.00 [0.99; 1.01]   | 0.000      | 1.000     | 0.000        | 0.70 [0.65; 0.76] | opposite   | SIGN obs only | Highly suggestive          | PRS 13 SNP                 |
|                                           | Type 2 diabetes mellitus | Systolic blood pressure | Per 20 mmHg increase;<br>Per 1 mmHg increase            | 1.75 [1.56; 1.97] | 0.97 [0.95; 1.00]   | 0.000      | 0.020     | 0.000        | 1.80 [1.56; 2.08] | opposite   | SIGN mr & obs | Highly suggestive          | PRS 13 SNP                 |
|                                           | Type 2 diabetes mellitus | Systolic blood pressure | Per 20 mmHg increase;<br>Per 1 mmHg increase            | 1.75 [1.56; 1.97] | 1.02 [1.01; 1.03]   | 0.000      | 0.000     | 0.000        | 1.72 [1.51; 1.95] | risk       | SIGN mr & obs |                            | PRS 6 SNP                  |
|                                           | Type 2 diabetes mellitus | Serum adiponectin       | Per 1 log µg/ml increase;<br>Per 1 SD decrease          | 0.72 [0.67; 0.78] | 0.86 [0.75; 0.99]   | 0.000      | 0.033     | 0.028        | 0.84 [0.68; 1.04] | opposite   | SIGN mr & obs | Highly suggestive          | PRS 3 SNP                  |
|                                           | Type 2 diabetes mellitus | Serum adiponectin       | Per 1 log µg/ml increase;                               | 0.72 [0.67; 0.78] | 0.94 [0.75; 1.19]   | 0.000      | 0.599     | 0.032        | 0.77 [0.56; 1.04] | protective | SIGN obs only |                            | PRS 3 SNP                  |

| Umbrella review         | Outcome                                | Exposure             | Comparison                                   | OBS ES [95% CI]   | MR ES [95% CI]    | OBS Pvalue        | MR Pvalue | P-value Het. | ROR [95% CI]      | Direction         | Concordance   | OBS credibility assessment | Genetic                                                      |
|-------------------------|----------------------------------------|----------------------|----------------------------------------------|-------------------|-------------------|-------------------|-----------|--------------|-------------------|-------------------|---------------|----------------------------|--------------------------------------------------------------|
|                         |                                        |                      | Per 1 SD decrease                            |                   |                   |                   |           |              |                   |                   |               |                            |                                                              |
|                         | Type 2 diabetes mellitus               | Serum adiponectin    | Per 1 log µg/ml increase; Per 1 SD decrease  | 0.72 [0.67; 0.78] |                   | 0.99 [0.95; 1.04] | 0.000     | 0.663        | 0.000             | 0.73 [0.64; 0.82] | protective    | SIGN obs only              | PRS 3 SNP                                                    |
|                         | Type 2 diabetes mellitus               | Serum CRP            | Per 1 log pm/ml increase; Per 10-s% increase | 1.26 [1.16; 1.37] |                   | 1.11 [0.94; 1.32] | 0.000     | 0.228        | 0.189             | 1.14 [0.88; 1.46] | risk          | SIGN obs only              | Highly suggestive<br>PRS 4 SNP                               |
|                         | Type 2 diabetes mellitus               | Serum CRP            | Per 1 log pm/ml increase; Per 10-s% increase | 1.26 [1.16; 1.37] |                   | 1.09 [0.95; 1.24] | 0.000     | 0.205        | 0.070             | 1.16 [0.93; 1.44] | risk          | SIGN obs only              | PRS 18 SNP                                                   |
|                         | Type 2 diabetes mellitus               | SUA                  | Per 1 mg/dl increase                         | 1.17 [1.09; 1.25] | 0.99 [0.92; 1.06] | 0.000             | 0.781     | 0.001        | 1.18 [1.03; 1.36] | opposite          | SIGN obs only | Suggestive                 | PRS 8 SNP                                                    |
|                         | Type 2 diabetes mellitus               | SUA                  | Per 1 mg/dl increase                         | 1.17 [1.09; 1.25] | 0.83 [0.57; 1.23] | 0.000             | 0.342     | 0.085        | 1.41 [0.90; 2.22] | opposite          | SIGN obs only |                            | PRS 8 SNP                                                    |
|                         | Type 2 diabetes mellitus               | SUA                  | Per 1 mg/dl increase                         | 1.17 [1.09; 1.25] | 0.99 [0.94; 1.04] | 0.000             | 0.697     | 0.000        | 1.18 [1.05; 1.33] | opposite          | SIGN obs only |                            | PRS 24 SNP                                                   |
|                         | Type 2 diabetes mellitus               | Serum vitamin D      | Highest versus lowest                        | 0.62 [0.54; 0.70] | 1.01 [0.86; 1.20] | 0.000             | 0.907     | 0.000        | 0.61 [0.46; 0.83] | opposite          | SIGN obs only | Convincing                 | PRS 5 SNP                                                    |
|                         | T2D                                    | Waist circumferences | Per 1SD increase; Per 1 unit increase        | 1.66 [1.47; 1.88] |                   | 1.05 [1.01; 1.10] | 0.000     | 0.025        | 0.000             | 1.58 [1.34; 1.87] | risk          | SIGN mr & obs              | Highly suggestive<br>PRS 5 SNP                               |
| <b>Markozannes 2020</b> | Venous thromboembolism                 | C reactive protein   | per 1 SD lnCRP                               | 1.14 [1.08; 1.19] | 0.80 [0.56; 1.12] | 0.000             | 0.207     | 0.047        | 1.42 [0.96; 2.12] | opposite          | SIGN obs only | Convincing                 | rs3091244, rs1130864, rs1205, rs3093077                      |
|                         | C-reactive protein and health outcomes | C reactive protein   | High vs low                                  | 1.75 [1.55; 1.98] |                   | 1.08 [0.86; 1.34] | 0.000     | 0.496        | 0.000             | 1.62 [1.15; 2.29] | risk          | SIGN obs only              | Highly suggestive<br>rs3091244, rs1130864, rs1205, rs3093077 |
|                         | Coronary Heart Disease                 | C reactive protein   | per 1 SD lnCRP                               | 1.38 [1.27; 1.49] |                   | 1.00 [0.90; 1.13] | 0.000     | 1.000        | 0.000             | 1.38 [1.14; 1.67] | risk          | SIGN obs only              | Highly suggestive<br>rs3093077, rs1205, rs1130864, rs1800947 |
|                         | Coronary Heart Disease                 | C reactive protein   | per 1 SD lnCRP                               | 1.38 [1.27; 1.49] | 1.00 [0.97; 1.02] | 0.000             | 1.000     | 0.000        | 1.38 [1.24; 1.53] | risk              | SIGN obs only |                            | rs7553007, rs1130864, rs1205                                 |

| Umbrella review | Outcome                          | Exposure           | Comparison     | OBS ES [95% CI]   | MR ES [95% CI]    | OBS Pvalue | MR Pvalue | P-value Het. | ROR [95% CI]       | Direction | Concordance   | OBS credibility assessment | Genetic                                    |
|-----------------|----------------------------------|--------------------|----------------|-------------------|-------------------|------------|-----------|--------------|--------------------|-----------|---------------|----------------------------|--------------------------------------------|
|                 | Coronary Heart Disease           | C reactive protein | per 1 SD lnCRP | 1.38 [1.27; 1.49] | 1.03 [0.99; 1.07] | 0.000      | 0.136     | 0.000        | 1.34 [1.19; 1.51]  | risk      | SIGN obs only |                            | rs1205                                     |
|                 | Coronary Heart Disease           | C reactive protein | per 1 SD lnCRP | 1.38 [1.27; 1.49] | 0.98 [0.94; 1.01] | 0.000      | 0.270     | 0.000        | 1.41 [1.25; 1.58]  | opposite  | SIGN obs only |                            | rs7553007                                  |
|                 | Coronary Heart Disease           | C reactive protein | per 1 SD lnCRP | 1.38 [1.27; 1.49] | 1.04 [0.61; 1.80] | 0.000      | 0.887     | 0.311        | 1.33 [0.71; 2.47]  | risk      | SIGN obs only |                            | rs6700896, rs4537545, rs7553007, rs1183910 |
|                 | Type 2 diabetes                  | C reactive protein | High vs low    | 1.26 [1.16; 1.37] | 1.11 [1.06; 1.17] | 0.000      | 0.000     | 0.013        | 1.13 [0.99; 1.29]  | risk      | SIGN mr & obs | Highly suggestive          | various SNPs                               |
|                 | Type 2 diabetes                  | C reactive protein | High vs low    | 1.26 [1.16; 1.37] | 1.08 [0.78; 1.48] | 0.000      | 0.638     | 0.361        | 1.17 [0.78; 1.75]  | risk      | SIGN obs only |                            | various SNPs                               |
|                 | Type 2 diabetes                  | C reactive protein | High vs low    | 1.26 [1.16; 1.37] | 1.21 [0.80; 1.82] | 0.000      | 0.363     | 0.850        | 1.04 [0.64; 1.71]  | risk      | SIGN obs only |                            | various SNPs                               |
|                 | Type 2 diabetes                  | C reactive protein | High vs low    | 1.26 [1.16; 1.37] | 1.15 [0.93; 1.42] | 0.000      | 0.195     | 0.431        | 1.10 [0.82; 1.47]  | risk      | SIGN obs only |                            | rs1130864, rs1205, rs1800947, rs3093077    |
|                 | Type 2 diabetes                  | C reactive protein | High vs low    | 1.26 [1.16; 1.37] | 1.11 [0.94; 1.32] | 0.000      | 0.228     | 0.189        | 1.14 [0.88; 1.46]  | risk      | SIGN obs only |                            | various SNPs                               |
|                 | Type 2 diabetes                  | C reactive protein | High vs low    | 1.26 [1.16; 1.37] | 1.09 [0.95; 1.24] | 0.000      | 0.205     | 0.070        | 1.16 [0.93; 1.44]  | risk      | SIGN obs only |                            | 17 SNPs                                    |
|                 | Type 2 diabetes                  | C reactive protein | High vs low    | 1.26 [1.16; 1.37] | 0.95 [0.82; 1.10] | 0.000      | 0.494     | 0.001        | 1.33 [1.05; 1.67]  | opposite  | SIGN obs only |                            | Genetic risk score of 8 SUA related SNPs   |
|                 | Hypertension                     | C reactive protein | High vs low    | 1.26 [1.13; 1.39] | 1.03 [0.61; 1.73] | 0.000      | 0.911     | 0.457        | 1.22 [0.65; 2.28]  | risk      | SIGN obs only | Suggestive                 | Genetic risk score of 31 SUA related SNPs  |
|                 | Ischemic stroke                  | C reactive protein | per 1mg/L CRP  | 1.15 [1.09; 1.22] | 1.19 [0.93; 1.53] | 0.000      | 0.171     | 0.793        | 0.97 [0.71; 1.31]  | risk      | SIGN obs only | Suggestive                 | Genetic risk score of 14 SUA related SNPs  |
|                 | Ischemic stroke                  | C reactive protein | per 1mg/L CRP  | 1.15 [1.09; 1.22] | 1.06 [0.87; 1.29] | 0.000      | 0.562     | 0.436        | 1.08 [0.84; 1.40]  | risk      | SIGN obs only |                            | Genetic risk score of 8 SUA related SNPs   |
|                 | Atrial fibrillation (recurrence) | C reactive protein | High vs low    | 4.05 [2.51; 6.54] | 0.76 [0.62; 0.93] | 0.000      | 0.008     | 0.000        | 5.33 [2.70; 10.54] | opposite  | SIGN mr & obs | Weak                       | Genetic risk score of 8 SUA related SNPs   |
|                 | Alzheimer's disease              | C reactive protein | High vs low    | 1.21 [1.03; 1.42] | 0.51 [0.30; 0.88] | 0.020      | 0.015     | 0.003        | 2.37 [1.17; 4.78]  | opposite  | SIGN mr & obs | Weak                       | Genetic risk score of 8 SUA related SNPs   |
|                 | Alzheimer's disease              | C reactive protein | High vs low    | 1.21 [1.03; 1.42] | 1.05 [0.88; 1.26] | 0.020      | 0.596     | 0.250        | 1.15 [0.82; 1.62]  | risk      | SIGN obs only |                            | Genetic risk score of 14 SUA related SNPs  |

| Umbrella review                                   | Outcome                         | Exposure            | Comparison                     | OBS ES [95% CI]   | MR ES [95% CI]    | OBS Pvalue | MR Pvalue | P-value Het. | ROR [95% CI]      | Direction  | Concordance      | OBS credibility assessment | Genetic                                                                                |
|---------------------------------------------------|---------------------------------|---------------------|--------------------------------|-------------------|-------------------|------------|-----------|--------------|-------------------|------------|------------------|----------------------------|----------------------------------------------------------------------------------------|
|                                                   | Alzheimer's disease             | C reactive protein  | High vs low                    | 1.21 [1.03; 1.42] | 1.04 [0.94; 1.17] | 0.020      | 0.482     | 0.127        | 1.16 [0.89; 1.52] | risk       | SIGN obs only    |                            | Genetic risk score of 3 SUA related SNPs                                               |
|                                                   | Alzheimer's disease             | C reactive protein  | High vs low                    | 1.21 [1.03; 1.42] | 0.36 [0.33; 0.40] | 0.020      | 0.000     | 0.000        | 3.36 [2.60; 4.34] | risk       | SIGN mr & obs    |                            | Genetic risk score of 8 SUA related SNPs                                               |
|                                                   | Alzheimer's disease             | C reactive protein  | High vs low                    | 1.21 [1.03; 1.42] | 1.26 [0.89; 1.78] | 0.020      | 0.191     | 0.835        | 0.96 [0.58; 1.59] | risk       | SIGN obs only    |                            | Genetic risk score of 14 SUA related SNPs                                              |
|                                                   | Alzheimer's disease             | C reactive protein  | High vs low                    | 1.21 [1.03; 1.42] | 1.26 [0.99; 1.61] | 0.020      | 0.062     | 0.785        | 0.96 [0.64; 1.44] | risk       | SIGN obs only    |                            | Genome-wide significant SNPs#                                                          |
|                                                   | Breast cancer                   | C reactive protein  | High vs low                    | 1.26 [1.06; 1.49] | 1.05 [0.77; 1.43] | 0.008      | 0.757     | 0.312        | 1.20 [0.74; 1.94] | risk       | SIGN obs only    | Weak                       | 3 SNPs functionally relevant to coffee metabolism (rs4410790, rs2472297 and rs2470893) |
|                                                   | Colon cancer                    | C reactive protein  | per unit lnCRP                 | 1.12 [1.05; 1.21] | 1.06 [0.98; 1.15] | 0.002      | 0.153     | 0.313        | 1.06 [0.91; 1.23] | risk       | SIGN obs only    | Weak                       | FTO rs3751812                                                                          |
|                                                   | Colorectal cancer               | C reactive protein  | per unit lnCRP                 | 1.12 [1.05; 1.21] | 1.04 [0.97; 1.12] | 0.002      | 0.285     | 0.150        | 1.08 [0.93; 1.24] | risk       | SIGN obs only    |                            | wGRS from 32 SNPs associated to BMI in GWAS studies                                    |
|                                                   | Colorectal cancer               | C reactive protein  | per unit lnCRP                 | 1.12 [1.05; 1.21] | 1.10 [0.74; 1.64] | 0.002      | 0.639     | 0.930        | 1.02 [0.64; 1.63] | risk       | SIGN obs only    |                            | CHRNA5 rs16969968 and CHRNA3rs1051730                                                  |
|                                                   | Colorectal cancer               | C reactive protein  | per unit lnCRP                 | 1.12 [1.05; 1.21] | 1.74 [1.06; 2.85] | 0.002      | 0.028     | 0.084        | 0.64 [0.37; 1.13] | risk       | SIGN mr & obs    |                            | CHRNA5 rs16969968 and CHRNA3rs1051730                                                  |
|                                                   | Non-fatal Myocardial Infarction | C reactive protein  | High vs low                    | 1.37 [0.62; 3.00] | 1.01 [0.74; 1.38] | 0.434      | 0.950     | 0.481        | 1.36 [0.45; 4.07] | risk       | NONSIGN mr & obs | Non-significant            | CHRNA5 rs16969968 and CHRNA3rs1051730                                                  |
|                                                   | Prostate cancer                 | C reactive protein  | per unit lnCRP                 | 1.07 [0.98; 1.17] | 1.02 [0.62; 1.69] | 0.134      | 0.938     | 0.854        | 1.05 [0.58; 1.89] | risk       | NONSIGN mr & obs | Non-significant            | CHRNA3 gene cluster rs1051730                                                          |
|                                                   | Rectal cancer                   | C reactive protein  | per unit lnCRP                 | 1.03 [0.90; 1.17] | 1.01 [0.91; 1.12] | 0.659      | 0.851     | 0.818        | 1.02 [0.81; 1.29] | risk       | NONSIGN mr & obs |                            | CHRNA3 gene cluster rs1051730                                                          |
| <b>Zhang 2020</b>                                 | Colorectal cancer               | Vitamin E           | Mean (μmol/L)                  | 0.24 [0.05; 1.09] | 0.94 [0.76; 1.17] | 0.065      | 0.574     | 0.081        | 0.25 [0.04; 1.44] | protective | NONSIGN mr & obs | Non-significant            | GRS                                                                                    |
| Non-genetic biomarkers and colorectal cancer risk | Colorectal cancer               | 25-hydroxyvitamin D | Highest with lowest categories | 0.67 [0.54; 0.83] | 0.91 [0.69; 1.19] | 0.000      | 0.498     | 0.084        | 0.74 [0.45; 1.20] | protective | SIGN obs only    | Suggestive                 | GRS                                                                                    |

| Umbrella review | Outcome           | Exposure           | Comparison                            | OBS ES [95% CI]     | MR ES [95% CI]    | OBS Pvalue | MR Pvalue | P-value Het. | ROR [95% CI]        | Direction  | Concordance      | OBS credibility assessment | Genetic                    |
|-----------------|-------------------|--------------------|---------------------------------------|---------------------|-------------------|------------|-----------|--------------|---------------------|------------|------------------|----------------------------|----------------------------|
|                 | Colorectal cancer | Selenium           | Highest vs. lowest category           | 0.86 [0.62; 1.18]   | 0.85 [0.75; 0.96] | 0.358      | 0.010     | 0.947        | 1.01 [0.65; 1.58]   | protective | SIGN mr only     | Non-significant            | GRS                        |
|                 | Colorectal cancer | Vitamin B12        | Mean (pmol/L)                         | 0.88 [0.78; 0.99]   | 1.21 [1.04; 1.42] | 0.044      | 0.016     | 0.002        | 0.73 [0.55; 0.96]   | opposite   | SIGN mr & obs    | Weak                       | GRS                        |
|                 | Colorectal cancer | Vitamin B6         | Highest vs lowest categories (pmol/l) | 0.53 [0.38; 0.71]   | 1.04 [0.90; 1.20] | 0.000      | 0.593     | 0.000        | 0.51 [0.32; 0.80]   | opposite   | SIGN obs only    | Weak                       | Single variant (rs1229984) |
|                 | Colorectal cancer | Serum Zinc         | Largest variation among serum levels  | 1.09 [0.00; 628.67] | 0.94 [0.86; 1.03] | 0.978      | 0.179     | 0.963        | 1.16 [0.00; 738.57] | protective | NONSIGN mr & obs | Non-significant            | PRS 5 SNP                  |
|                 | Colorectal cancer | DHA 22:6n-3        | Mean (% total fatty acids)            | 0.88 [0.57; 1.36]   | 1.32 [0.94; 1.87] | 0.568      | 0.114     | 0.153        | 0.67 [0.31; 1.45]   | opposite   | NONSIGN mr & obs | Non-significant            | PRS 3 SNP                  |
|                 | Colorectal cancer | EPA 20:5n-3        | Mean (% total fatty acids)            | 0.17 [0.01; 5.19]   | 1.06 [0.91; 1.22] | 0.309      | 0.436     | 0.294        | 0.16 [0.00; 5.67]   | opposite   | NONSIGN mr & obs | Non-significant            | PRS 96 SNP                 |
|                 | Colorectal cancer | DPA 20:5n-3        | Mean (% total fatty acids)            | 2.18 [0.61; 7.59]   | 1.58 [0.99; 2.52] | 0.225      | 0.055     | 0.639        | 1.38 [0.25; 7.74]   | opposite   | NONSIGN mr & obs | Non-significant            | Single variant (rs9939609) |
|                 | Colorectal cancer | Total cholesterol  | Highest vs. lowest categories         | 1.11 [0.98; 1.27]   | 1.46 [1.20; 1.79] | 0.115      | 0.000     | 0.024        | 0.76 [0.55; 1.06]   | risk       | SIGN mr only     | Non-significant            | PRS 14 SNP                 |
|                 | Colorectal cancer | Triglyceride       | Highest vs. lowest categories         | 1.17 [0.99; 1.37]   | 0.98 [0.85; 1.12] | 0.058      | 0.774     | 0.103        | 1.19 [0.88; 1.61]   | opposite   | NONSIGN mr & obs | Non-significant            | PRS 13 SNP                 |
|                 | Colorectal cancer | LDL-cholesterol    | Highest vs. lowest categories         | 1.04 [0.57; 1.92]   | 1.05 [0.92; 1.18] | 0.899      | 0.442     | 0.976        | 0.99 [0.48; 2.06]   | risk       | NONSIGN mr & obs | Non-significant            | PRS 13 SNP                 |
|                 | Colorectal cancer | HDL-cholesterol    | Highest vs. lowest categories         | 0.83 [0.67; 1.04]   | 0.94 [0.84; 1.05] | 0.097      | 0.277     | 0.322        | 0.88 [0.63; 1.23]   | protective | NONSIGN mr & obs | Non-significant            | PRS 6 SNP                  |
|                 | Colorectal cancer | C-reactive protein | 1-unit change in ln (mg/l)            | 1.14 [1.04; 1.25]   | 1.04 [0.97; 1.12] | 0.005      | 0.285     | 0.123        | 1.10 [0.93; 1.29]   | risk       | SIGN obs only    | Weak                       | PRS 3 SNP                  |
|                 | Colorectal cancer | IL-6               | 1-unit change in ln (mg/l)            | 1.09 [0.85; 1.39]   | 0.98 [0.96; 1.00] | 0.492      | 0.052     | 0.398        | 1.11 [0.85; 1.45]   | opposite   | NONSIGN mr & obs | Non-significant            | PRS 3 SNP                  |
|                 | Colorectal cancer | Fasting glucose    | Highest vs lowest                     | 1.27 [1.11; 1.45]   | 1.04 [0.92; 1.18] | 0.000      | 0.537     | 0.032        | 1.22 [0.94; 1.58]   | protective | SIGN obs only    | Highly suggestive          | PRS 3 SNP                  |

| Umbrella review | Outcome           | Exposure        | Comparison                       | OBS ES [95% CI]   | MR ES [95% CI]    | OBS Pvalue | MR Pvalue | P-value Het. | ROR [95% CI]      | Direction  | Concordance      | OBS credibility assessment | Genetic    |
|-----------------|-------------------|-----------------|----------------------------------|-------------------|-------------------|------------|-----------|--------------|-------------------|------------|------------------|----------------------------|------------|
|                 |                   |                 | categories (mmol/L)              |                   |                   |            |           |              |                   |            |                  |                            |            |
|                 | Colorectal cancer | HbA1C           | Highest vs lowest categories (%) | 1.25 [0.93; 1.67] | 1.02 [0.85; 1.22] | 0.135      | 0.830     | 0.247        | 1.23 [0.76; 1.97] | risk       | NONSIGN mr & obs | Non-significant            | PRS 4 SNP  |
|                 | Colorectal cancer | IGF-I           | Highest vs lowest categories (%) | 1.31 [1.05; 1.63] | 0.88 [0.76; 1.01] | 0.016      | 0.078     | 0.003        | 1.49 [1.04; 2.14] | opposite   | SIGN obs only    | Weak                       | PRS 18 SNP |
|                 | Colorectal cancer | Adiponectin     | Highest vs lowest categories (%) | 0.78 [0.65; 0.95] | 0.97 [0.91; 1.04] | 0.010      | 0.371     | 0.034        | 0.80 [0.62; 1.04] | protective | SIGN obs only    | Weak                       | PRS 8 SNP  |
|                 | Colorectal cancer | Telomere length | Shortest Q4 vs longest Q2        | 1.02 [0.75; 1.40] | 1.25 [0.92; 1.69] | 0.901      | 0.150     | 0.360        | 0.82 [0.44; 1.51] | risk       | NONSIGN mr & obs | Non-significant            | PRS 8 SNP  |
