# Supplementary material for: Validity of observational evidence on putative risk and protective factors: appraisal of 3744 meta-analyses on 57 topics
Source: Springer Nature journal article supplement (doi:10.1186/s12916-021-02020-6), 2021-07-06
Supplement: MOESM7 [file 19336644]

**Additional file 7: Table 2 Comparisons of observational studies and RCTs**

| Umbrella review                                  | Outcome                        | Exposure | Comparison                     | OBS ES [95% CI]   | RCT ES [95% CI]   | OBS Pvalue | RCT Pvalue | P-value Het. | ROR [95% CI]      | Direction  | Concordance       | OBS credibility assessment |
|--------------------------------------------------|--------------------------------|----------|--------------------------------|-------------------|-------------------|------------|------------|--------------|-------------------|------------|-------------------|----------------------------|
| <b>Yazhou 2018</b>                               | 30-day mortality               | Statins  | 30-day mortality               | 0.62 [0.50; 0.77] | 0.93 [0.46; 1.90] | 0.000      | 0.841      | 0.284        | 0.67 [0.26; 1.68] | protective | SIGN obs only     | Suggestive                 |
| Statins and multiple non-cardiovascular outcomes | All-cause mortality            | Statins  | All-cause mortality            | 0.73 [0.64; 0.83] | 0.98 [0.60; 1.59] | 0.000      | 0.935      | 0.252        | 0.74 [0.40; 1.38] | protective | SIGN obs only     | Suggestive                 |
|                                                  | Cancer                         | Statins  | Cancer                         | 0.85 [0.78; 0.92] | 1.02 [0.97; 1.08] | 0.000      | 0.470      | 0.000        | 0.83 [0.73; 0.95] | opposite   | SIGN obs only     | Suggestive                 |
|                                                  | Colorectal cancer              | Statins  | Colorectal cancer              | 0.91 [0.83; 1.00] | 0.96 [0.85; 1.08] | 0.047      | 0.504      | 0.490        | 0.95 [0.77; 1.17] | protective | SIGN obs only     | Weak                       |
|                                                  | Hip fracture                   | Statins  | Hip fracture                   | 0.70 [0.51; 0.96] | 1.23 [0.51; 2.97] | 0.027      | 0.645      | 0.238        | 0.57 [0.17; 1.88] | opposite   | SIGN obs only     | Weak                       |
|                                                  | Gastric cancer                 | Statins  | Gastric cancer                 | 0.61 [0.39; 0.96] | 0.83 [0.66; 1.05] | 0.031      | 0.116      | 0.234        | 0.73 [0.37; 1.45] | protective | SIGN obs only     | Weak                       |
|                                                  | Hematological cancer           | Statins  | Hematological cancer           | 0.88 [0.82; 0.95] | 0.92 [0.77; 1.09] | 0.001      | 0.347      | 0.644        | 0.96 [0.75; 1.22] | protective | SIGN obs only     | Weak                       |
|                                                  | In-hospital mortality          | Statins  | In-hospital mortality          | 0.48 [0.24; 0.97] | 0.98 [0.73; 1.33] | 0.039      | 0.895      | 0.066        | 0.49 [0.18; 1.33] | protective | SIGN obs only     | Weak                       |
|                                                  | Infection                      | Statins  | Infection                      | 0.57 [0.43; 0.75] | 1.00 [0.96; 1.04] | 0.000      | 1.000      | 0.000        | 0.57 [0.41; 0.78] | opposite   | SIGN obs only     | Suggestive                 |
|                                                  | Infection related mortality    | Statins  | Infection related mortality    | 0.78 [0.64; 0.95] | 0.84 [0.67; 1.04] | 0.014      | 0.120      | 0.623        | 0.93 [0.61; 1.41] | protective | SIGN obs only     | Weak                       |
|                                                  | Liver cancer                   | Statins  | Liver cancer                   | 0.54 [0.34; 0.87] | 0.95 [0.62; 1.45] | 0.010      | 0.813      | 0.080        | 0.57 [0.23; 1.39] | protective | SIGN obs only     | Weak                       |
|                                                  | Myopathy                       | Statins  | Myopathy                       | 2.63 [1.50; 4.61] | 1.19 [0.88; 1.62] | 0.001      | 0.264      | 0.015        | 2.21 [0.93; 5.26] | risk       | SIGN obs only     | Suggestive                 |
|                                                  | Pancreatitis                   | Statins  | Pancreatitis                   | 1.41 [1.15; 1.74] | 0.77 [0.61; 0.97] | 0.001      | 0.027      | 0.000        | 1.83 [1.18; 2.84] | opposite   | SIGN rct & obs    | Weak                       |
|                                                  | Prostate cancer                | Statins  | Prostate cancer                | 0.93 [0.87; 1.00] | 1.06 [0.93; 1.20] | 0.041      | 0.370      | 0.077        | 0.88 [0.72; 1.07] | opposite   | SIGN obs only     | Weak                       |
|                                                  | Sustained virological response | Statins  | Sustained virological response | 1.39 [1.22; 1.59] | 1.24 [1.06; 1.46] | 0.000      | 0.008      | 0.281        | 1.12 [0.84; 1.50] | protective | SIGN rct & obs    | Suggestive                 |
|                                                  | ARDS mortality                 | Statins  | ARDS mortality                 | 1.05 [0.78; 1.40] | 0.99 [0.78; 1.26] | 0.744      | 0.935      | 0.760        | 1.06 [0.62; 1.81] | opposite   | NONSIGN rct & obs | Non-significant            |
|                                                  | Bladder cancer                 | Statins  | Bladder cancer                 | 1.11 [0.91; 1.35] | 0.83 [0.63; 1.10] | 0.300      | 0.190      | 0.095        | 1.34 [0.83; 2.15] | opposite   | NONSIGN rct & obs | Non-significant            |
|                                                  | Breast cancer                  | Statins  | Breast cancer                  | 1.01 [0.97; 1.06] | 1.04 [0.78; 1.39] | 0.660      | 0.790      | 0.844        | 0.97 [0.70; 1.36] | risk       | NONSIGN rct & obs | Non-significant            |
|                                                  | Gynecologic cancer             | Statins  | Gynecologic cancer             | 1.03 [0.94; 1.12] | 0.97 [0.62; 1.50] | 0.508      | 0.892      | 0.794        | 1.06 [0.63; 1.80] | opposite   | NONSIGN rct & obs | Non-significant            |
|                                                  | Kidney cancer                  | Statins  | Kidney cancer                  | 1.07 [0.96; 1.20] | 1.01 [0.57; 1.79] | 0.235      | 0.973      | 0.846        | 1.06 [0.53; 2.10] | risk       | NONSIGN rct & obs | Non-significant            |

| Umbrella review               | Outcome                        | Exposure  | Comparison                     | OBS ES [95% CI]   | RCT ES [95% CI]   | OBS Pvalue | RCT Pvalue | P-value Het. | ROR [95% CI]      | Direction  | Concordance       | OBS credibility assessment |
|-------------------------------|--------------------------------|-----------|--------------------------------|-------------------|-------------------|------------|------------|--------------|-------------------|------------|-------------------|----------------------------|
|                               | Pancreatic cancer              | Statins   | Pancreatic cancer              | 1.05 [0.93; 1.19] | 0.99 [0.45; 2.21] | 0.438      | 0.980      | 0.886        | 1.06 [0.42; 2.66] | opposite   | NONSIGN rct & obs | Non-significant            |
|                               | Skin cancer                    | Statins   | Skin cancer                    | 0.88 [0.74; 1.05] | 1.02 [0.82; 1.28] | 0.152      | 0.862      | 0.307        | 0.86 [0.58; 1.28] | opposite   | NONSIGN rct & obs | Non-significant            |
|                               | Lung cancer                    | Statins   | Lung cancer                    | 0.86 [0.74; 1.00] | 0.95 [0.85; 1.06] | 0.050      | 0.362      | 0.296        | 0.91 [0.70; 1.18] | protective | SIGN obs only     | Non-significant            |
|                               | Femoral bone mineral density   | Statins   | Femoral bone mineral density   | 1.34 [0.83; 2.14] | 1.99 [1.08; 3.68] | 0.228      | 0.028      | 0.314        | 0.67 [0.23; 1.99] | protective | SIGN rct only     | Non-significant            |
|                               | Hip bone mineral density       | Statins   | Hip bone mineral density       | 1.49 [1.27; 1.75] | 1.31 [0.19; 9.27] | 0.000      | 0.785      | 0.899        | 1.14 [0.14; 9.43] | protective | SIGN obs only     | Weak                       |
|                               | Spine bone mineral density     | Statins   | Spine bone mineral density     | 1.29 [1.00; 1.63] | 1.11 [0.85; 1.49] | 0.042      | 0.448      | 0.446        | 1.16 [0.68; 1.95] | protective | SIGN obs only     | Weak                       |
|                               | Fracture                       | Statins   | Fracture                       | 0.97 [0.83; 1.12] | 1.03 [0.91; 1.16] | 0.690      | 0.633      | 0.542        | 0.94 [0.72; 1.24] | opposite   | NONSIGN rct & obs | Non-significant            |
|                               | Acute kidney injury            | Statins   | Acute kidney injury            | 1.13 [0.81; 1.57] | 0.50 [0.31; 0.82] | 0.469      | 0.005      | 0.007        | 2.26 [1.00; 5.12] | opposite   | SIGN rct only     | Non-significant            |
|                               | Diabetes                       | Statins   | Diabetes                       | 1.44 [1.24; 1.67] | 1.12 [1.04; 1.21] | 0.000      | 0.003      | 0.003        | 1.29 [1.03; 1.61] | risk       | SIGN rct & obs    | Suggestive                 |
|                               | Cataract                       | Statins   | Cataract                       | 1.13 [1.01; 1.25] | 0.89 [0.72; 1.10] | 0.025      | 0.281      | 0.049        | 1.27 [0.92; 1.75] | opposite   | SIGN obs only     | Weak                       |
|                               | Ventilator free days           | Statins   | Ventilator free days           | 1.01 [0.96; 1.06] | 1.04 [0.94; 1.14] | 0.811      | 0.484      | 0.607        | 0.97 [0.84; 1.12] | protective | NONSIGN rct & obs | Non-significant            |
|                               | Contrast-induced nephropathy   | Statins   | Contrast-induced nephropathy   | 0.61 [0.37; 1.00] | 0.57 [0.47; 0.69] | 0.051      | 0.000      | 0.803        | 1.07 [0.54; 2.13] | protective | SIGN rct only     | Non-significant            |
| <b>Theodoratou 2014</b>       | Birth length                   | Vitamin D | Birth length                   | 1.05 [0.93; 1.19] | 1.15 [0.94; 1.40] | 0.413      | 0.167      | 0.459        | 0.92 [0.67; 1.26] | protective | NONSIGN rct & obs | Non-significant            |
| Vitamin D and health outcomes | CVD                            | Vitamin D | CVD                            | 0.66 [0.57; 0.77] | 0.95 [0.86; 1.05] | 0.000      | 0.314      | 0.000        | 0.69 [0.54; 0.89] | protective | SIGN obs only     | Highly suggestive          |
|                               | Small for gestational age      | Vitamin D | Small for gestational age      | 0.54 [0.44; 0.67] | 0.67 [0.40; 1.11] | 0.000      | 0.124      | 0.444        | 0.81 [0.39; 1.66] | protective | SIGN obs only     | Weak                       |
|                               | Birth weight; Low birth weight | Vitamin D | Birth weight; Low birth weight | 1.12 [1.07; 1.17] | 0.40 [0.23; 0.71] | 0.000      | 0.001      | 0.000        | 2.80 [1.52; 5.15] | protective | SIGN rct & obs    | Weak                       |
|                               | Head circumference at birth    | Vitamin D | Head circumference at birth    | 1.02 [0.90; 1.15] | 1.26 [1.03; 1.53] | 0.735      | 0.021      | 0.075        | 0.81 [0.59; 1.11] | protective | SIGN rct only     | Non-significant            |
|                               | Mortality                      | Vitamin D | Mortality                      | 0.86 [0.81; 0.92] | 1.40 [0.38; 5.15] | 0.000      | 0.613      | 0.464        | 0.61 [0.16; 2.41] | opposite   | SIGN obs only     | Suggestive                 |
|                               | All-cause mortality            | Vitamin D | All-cause mortality            | 0.72 [0.66; 0.78] | 0.91 [0.82; 1.02] | 0.000      | 0.090      | 0.001        | 0.79 [0.65; 0.96] | protective | SIGN obs only     | Highly suggestive          |
|                               | Fracture                       | Vitamin D | Fracture                       | 0.31 [0.23; 0.42] | 1.01 [0.93; 1.09] | 0.000      | 0.806      | 0.000        | 0.31 [0.21; 0.45] | opposite   | SIGN obs only     | Weak                       |

| Umbrella review                      | Outcome                   | Exposure         | Comparison                | OBS ES [95% CI]   | RCT ES [95% CI]   | OBS Pvalue | RCT Pvalue | P-value Het. | ROR [95% CI]       | Direction  | Concordance       | OBS credibility assessment |
|--------------------------------------|---------------------------|------------------|---------------------------|-------------------|-------------------|------------|------------|--------------|--------------------|------------|-------------------|----------------------------|
|                                      | Hip fracture              | Vitamin D        | Hip fracture              | 0.77 [0.72; 0.79] | 1.15 [0.99; 1.33] | 0.000      | 0.063      | 0.000        | 0.67 [0.55; 0.82]  | opposite   | SIGN obs only     | Weak                       |
| <b>Kim 2020</b>                      | All-cause mortality       | CKD              | All-cause mortality       | 0.82 [0.76; 0.88] | 0.99 [0.67; 1.46] | 0.000      | 0.960      | 0.351        | 0.83 [0.52; 1.32]  | protective | SIGN obs only     | Suggestive                 |
| Chronic kidney disease and mortality | All-cause mortality       | CKD              | All-cause mortality       | 1.81 [1.47; 2.24] | 0.92 [0.54; 1.46] | 0.000      | 0.742      | 0.014        | 1.97 [0.97; 3.99]  | opposite   | SIGN obs only     | Suggestive                 |
|                                      | All-cause mortality       | CKD              | All-cause mortality       | 0.79 [0.71; 0.89] | 0.99 [0.78; 1.27] | 0.000      | 0.936      | 0.100        | 0.80 [0.56; 1.14]  | protective | SIGN obs only     | Weak                       |
|                                      | All-cause mortality       | CKD              | All-cause mortality       | 0.90 [0.71; 1.15] | 0.58 [0.36; 0.91] | 0.392      | 0.021      | 0.099        | 1.55 [0.77; 3.14]  | protective | SIGN rct only     | Non-significant            |
|                                      | All-cause mortality       | CKD              | All-cause mortality       | 0.50 [0.42; 0.59] | 0.76 [0.49; 1.17] | 0.000      | 0.216      | 0.079        | 0.66 [0.36; 1.20]  | protective | SIGN obs only     | Suggestive                 |
|                                      | All-cause mortality       | CKD              | All-cause mortality       | 0.67 [0.49; 0.93] | 0.90 [0.80; 1.02] | 0.014      | 0.089      | 0.091        | 0.74 [0.48; 1.16]  | protective | SIGN obs only     | Weak                       |
|                                      | All-cause mortality       | CKD              | All-cause mortality       | 0.65 [0.57; 0.75] | 1.13 [0.63; 2.03] | 0.000      | 0.682      | 0.071        | 0.58 [0.28; 1.18]  | opposite   | SIGN obs only     | Suggestive                 |
|                                      | All-cause mortality       | CKD              | All-cause mortality       | 0.53 [0.32; 0.87] | 1.55 [0.52; 4.62] | 0.013      | 0.432      | 0.080        | 0.34 [0.07; 1.68]  | opposite   | SIGN obs only     | Weak                       |
|                                      | All-cause mortality       | CKD              | All-cause mortality       | 0.72 [0.64; 0.81] | 0.86 [0.75; 0.99] | 0.000      | 0.033      | 0.056        | 0.84 [0.65; 1.08]  | protective | SIGN rct & obs    | Weak                       |
|                                      | All-cause mortality       | CKD              | All-cause mortality       | 0.61 [0.43; 0.86] | 0.82 [0.53; 1.27] | 0.005      | 0.373      | 0.298        | 0.74 [0.34; 1.63]  | protective | SIGN obs only     | Weak                       |
| <b>Veronese 2020</b>                 | Stroke                    | Low dose aspirin | Stroke                    | 1.54 [0.91; 2.60] | 0.81 [0.66; 0.99] | 0.110      | 0.036      | 0.025        | 1.90 [0.92; 3.93]  | opposite   | SIGN rct only     | Non-significant            |
| Low-dose aspirin and health outcomes | Death                     | Low dose aspirin | Death                     | 0.81 [0.60; 1.09] | 0.95 [0.82; 1.12] | 0.160      | 0.530      | 0.338        | 0.85 [0.54; 1.33]  | protective | NONSIGN rct & obs | Non-significant            |
|                                      | AMI                       | Low dose aspirin | AMI                       | 1.21 [0.63; 2.32] | 0.68 [0.43; 1.07] | 0.576      | 0.097      | 0.160        | 1.77 [0.58; 5.39]  | opposite   | NONSIGN rct & obs | Non-significant            |
|                                      | CVD death                 | Low dose aspirin | CVD death                 | 0.93 [0.42; 2.05] | 0.97 [0.71; 1.34] | 0.859      | 0.871      | 0.917        | 0.96 [0.32; 2.90]  | protective | NONSIGN rct & obs | Non-significant            |
|                                      | Death                     | Low dose aspirin | Death                     | 1.58 [0.48; 5.18] | 1.16 [0.41; 3.27] | 0.447      | 0.776      | 0.700        | 1.36 [0.15; 12.55] | risk       | NONSIGN rct & obs | Non-significant            |
|                                      | Re-operation for bleeding | Low dose aspirin | Re-operation for bleeding | 1.23 [0.61; 2.48] | 1.80 [1.03; 3.16] | 0.558      | 0.039      | 0.404        | 0.68 [0.19; 2.40]  | risk       | SIGN rct only     | Non-significant            |
|                                      | AMI                       | Low dose aspirin | AMI                       | 1.27 [0.49; 3.27] | 0.73 [0.37; 1.44] | 0.625      | 0.365      | 0.354        | 1.74 [0.34; 8.88]  | opposite   | NONSIGN rct & obs | Non-significant            |
|                                      | Intra-cranial bleeding    | Low dose aspirin | Intra-cranial bleeding    | 2.66 [0.56; 7.58] | 1.29 [1.02; 1.63] | 0.140      | 0.035      | 0.281        | 2.07 [0.45; 9.59]  | risk       | SIGN rct only     | Non-significant            |
|                                      | Ischemic stroke           | Low dose aspirin | Ischemic stroke           | 0.95 [0.56; 1.62] | 0.93 [0.80; 1.08] | 0.857      | 0.351      | 0.940        | 1.02 [0.52; 2.02]  | protective | NONSIGN rct & obs | Non-significant            |

| <b>Umbrella review</b>                                                 | <b>Outcome</b>    | <b>Exposure</b>  | <b>Comparison</b> | <b>OBS ES [95% CI]</b> | <b>RCT ES [95% CI]</b> | <b>OBS Pvalue</b> | <b>RCT Pvalue</b> | <b>P-value Het.</b> | <b>ROR [95% CI]</b> | <b>Direction</b> | <b>Concordance</b> | <b>OBS credibility assessment</b> |
|------------------------------------------------------------------------|-------------------|------------------|-------------------|------------------------|------------------------|-------------------|-------------------|---------------------|---------------------|------------------|--------------------|-----------------------------------|
|                                                                        | Gastric cancer    | Low dose aspirin | Gastric cancer    | 0.67 [0.31; 1.44]      | 0.74 [0.49; 1.14]      | 0.301             | 0.177             | 0.803               | 0.89 [0.27; 2.96]   | protective       | NONSIGN rct & obs  | Non-significant                   |
| <b>Zhang 2020</b><br>Non-genetic biomarkers and colorectal cancer risk | Colorectal cancer | Vitamin E        | Colorectal cancer | 0.24 [0.05; 1.09]      | 0.89 [0.76; 1.05]      | 0.065             | 0.158             | 0.092               | 0.27 [0.05; 1.45]   | protective       | NONSIGN rct & obs  | Non-significant                   |
