# Supplementary material for: Validity of observational evidence on putative risk and protective factors: appraisal of 3744 meta-analyses on 57 topics
Source: Springer Nature journal article supplement (doi:10.1186/s12916-021-02020-6), 2021-07-06
Supplement: MOESM9 [file 19336644]

# Additional file 9: Figures 44 to 45 Forest plot of the ROR comparing meta-analyses

## of observational studies with

### 44) Meta-analyses of RCTs

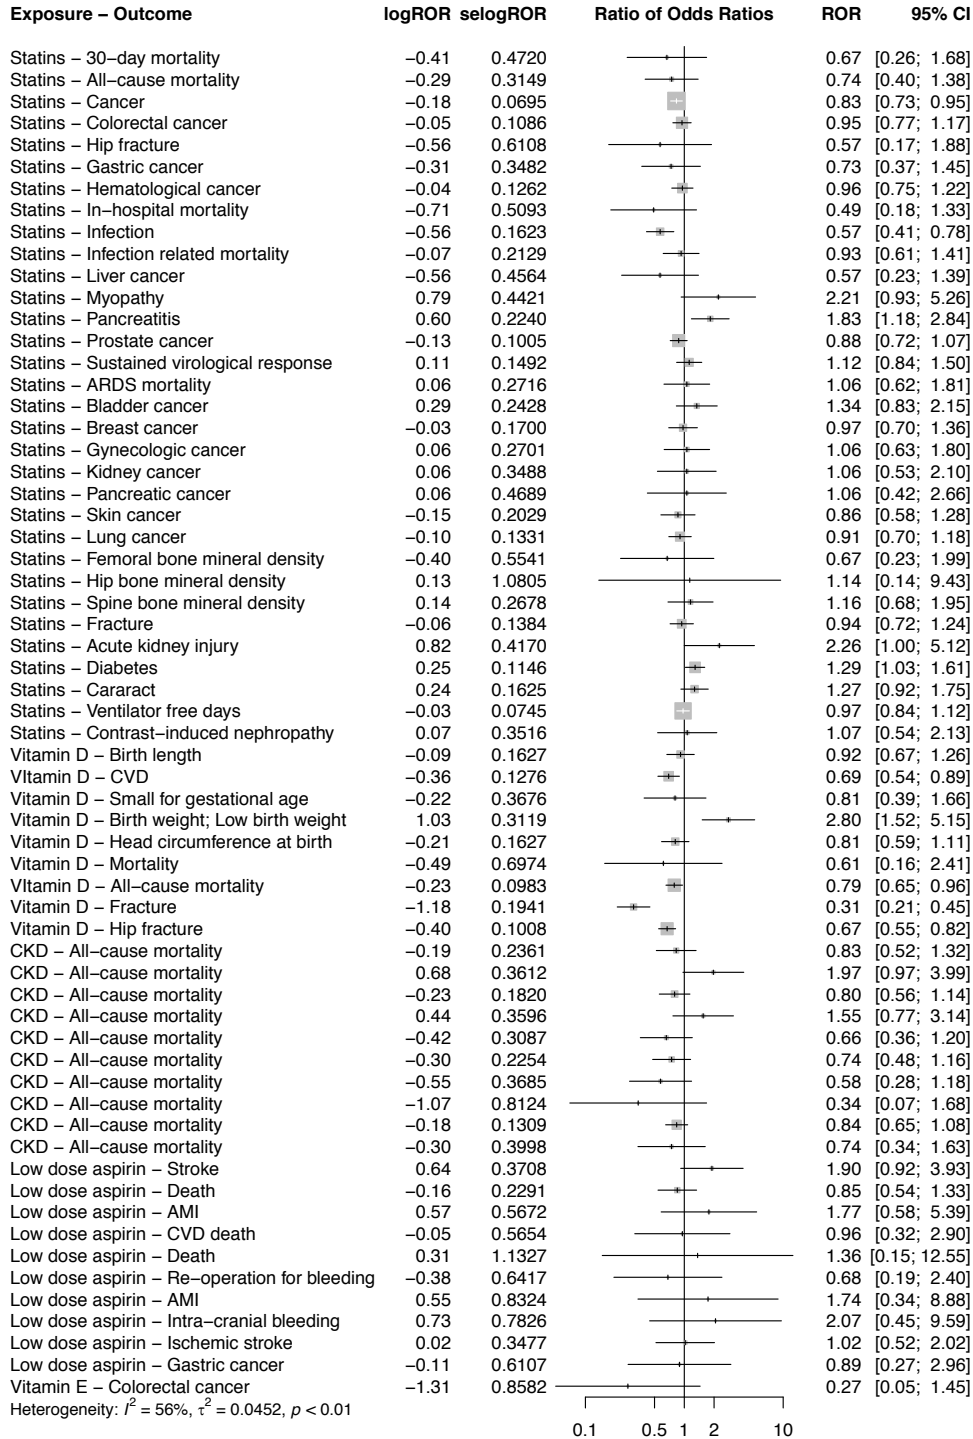

# 45) MR studies

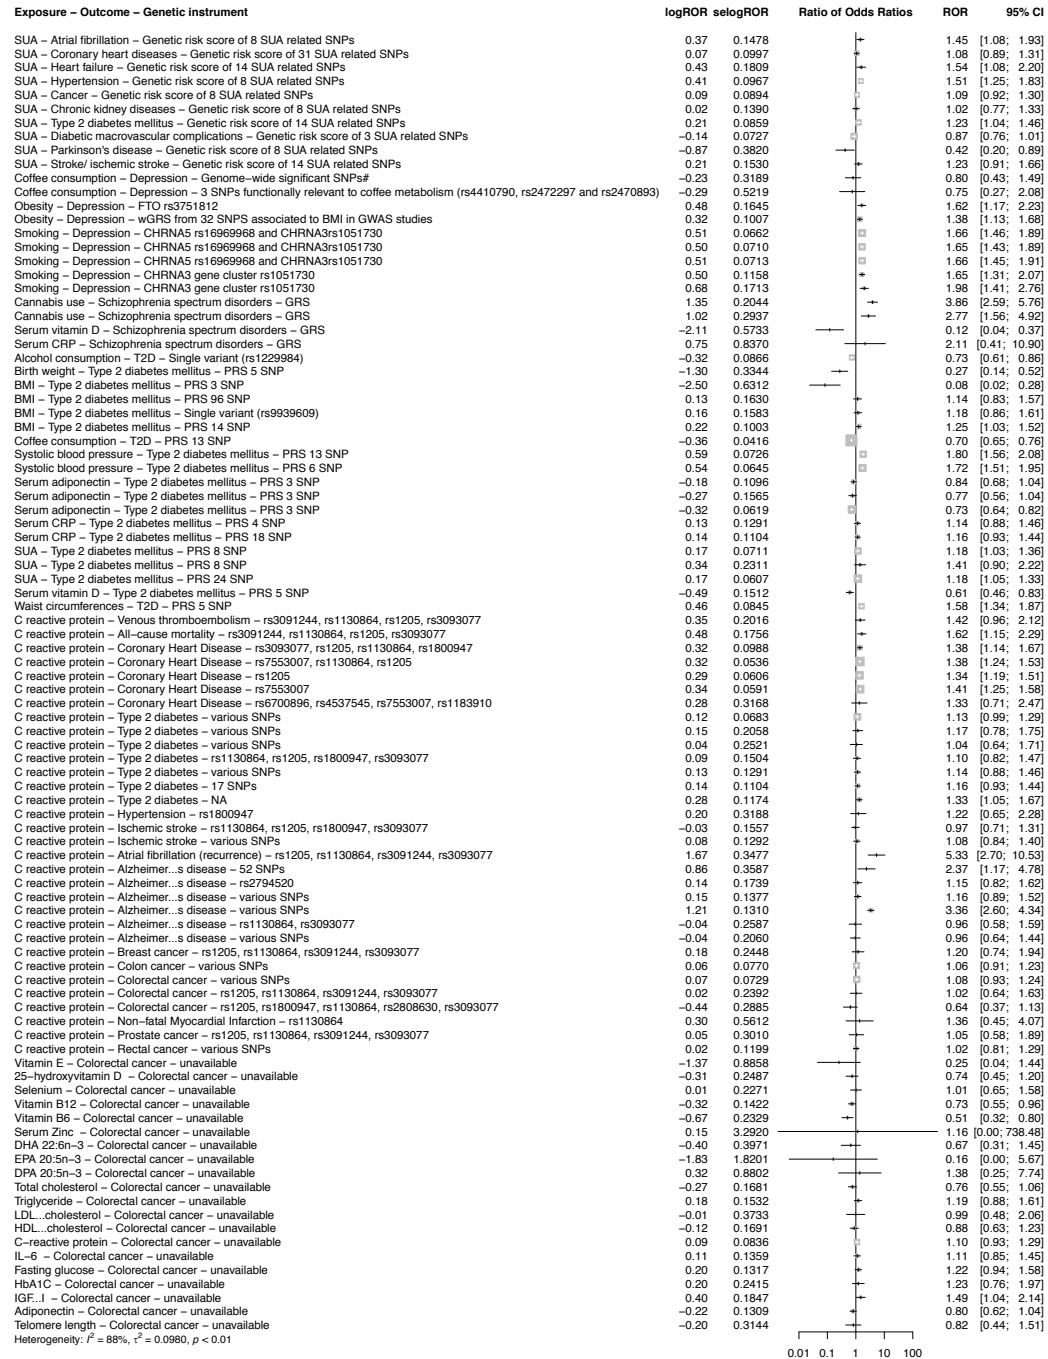

A ROR < 1 indicates that the exposure is relatively more favorable in observational studies compared with RCTs or MR studies

In figure B, some associations such as, for example, coffee consumptions and depression, are assessed by more than one MR study using different genetic instruments
